# Supplementary material
Source: PubMed Central journal article supplement (PMC6397575)
Supplement: pnas.1815656116.sapp.pdf [file pnas.1815656116.sapp.pdf]

## Supplementary Information for

***Rhizobium* induces DNA damage in *Caenorhabditis elegans* intestinal cells.**

Marina Kniazeva and Gary Ruvkun

Marina Kniazeva

Email: [kniazeva@molbio.mgh.harvard.edu](mailto:kniazeva@molbio.mgh.harvard.edu)

**This PDF file includes:**

Figs. S1 to S10  
Tables S1  
Captions for movies S1 to S3

**Other supplementary materials for this manuscript include the following:**

Movies S1 to S3

*sur-5::GFP* adults

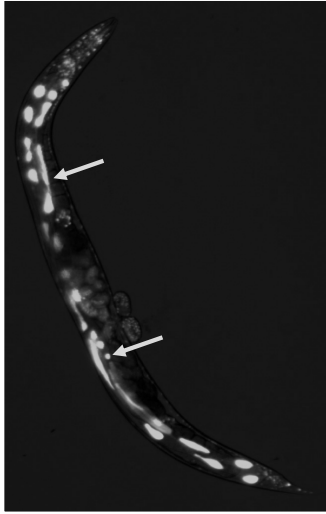

*Spingobacterium* sp.  
(JU56 aka H7)

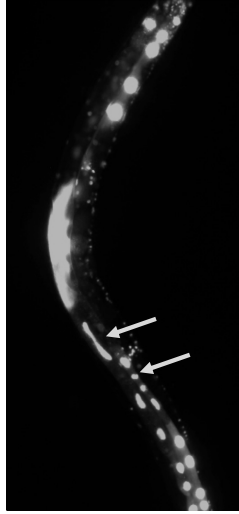

*Pseudomonas* sp.  
(JU42 aka B6)

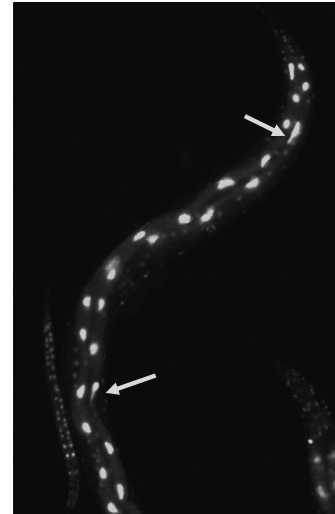

*Providencia* sp.  
(JU39 aka G5)

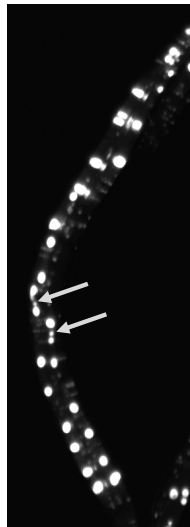

*Rhizobium huautlense*  
(ATCC®BAA-115)

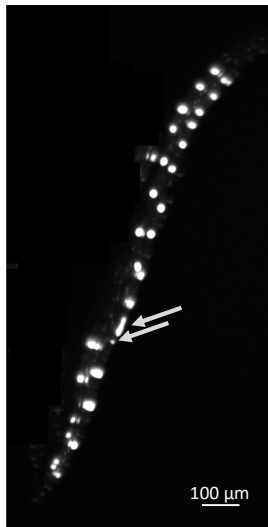

*Rhizobium galegae*  
(ATCC®43677)

Fig. S1. Wild bacterial isolates from the JUb library (5, 7) and *Rhizobium* species from ATCC collection alter karyokinesis in the *C. elegans* intestinal cells. Fluorescence images of *sur-5::GFP* *C. elegans* fed on the indicated bacteria. Arrows point to abnormally shaped nuclei which are elongated or fragmented.

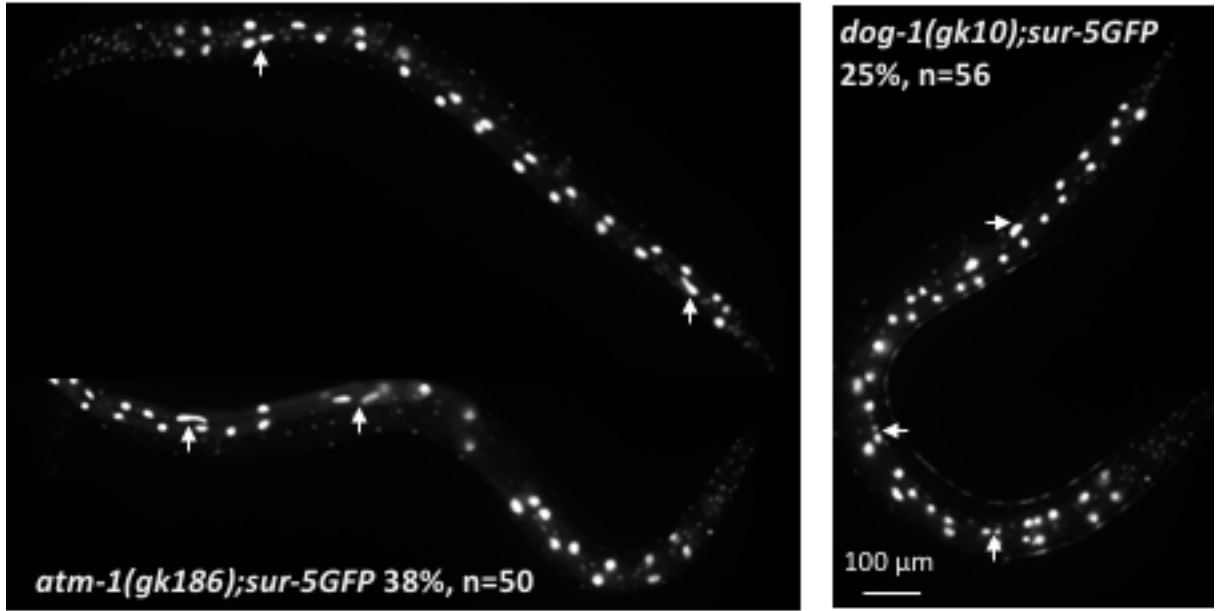

Fig. S2. *C. elegans* mutants from Caenorhabditis Genetic Center (CGC), *atm-1* and *dog-1*, crossed with *sur-5::GFP* reporter strain show abnormal karyokinesis in the gut. Bright light and fluorescence images of the standard mutant alleles for these genes obtained from the *Caenorhabditis* Genetics Center (CGC). Arrows point to the elongated and double nuclei.

| RNAi target gene                            | cosmid name | % affected worms | n, scored |
|---------------------------------------------|-------------|------------------|-----------|
| control L4440 empty vector                  |             |                  | 8 80      |
| <b>Double strand break repair</b>           |             |                  |           |
| <i>mus-101</i>                              | F37D6.1     | 36               | 105       |
| <i>rad-51</i>                               | Y43C5A.6    | 28               | 83        |
| <b>Chromatid cohesion/Chromatin factors</b> |             |                  |           |
| <i>lin-40 (former erg-1)</i>                | T27C4.4     | 72               | 91        |
| <i>pgn-85</i>                               | Y43H11AL.3  | 6                | 80        |
| <b>Mitosis/Meiosis</b>                      |             |                  |           |
| <i>ani-2</i>                                | K10B2.5     | 10               | 80        |
| <b>Protein degradation</b>                  |             |                  |           |
| <i>wwp-1</i>                                | Y65b4br.4   | 30               | 44        |
| <b>RNA processing and trafficking</b>       |             |                  |           |
| <i>npp-15</i>                               | C29E4.4     | 6.25             |           |
| <i>nola-3 (RNP complex)</i>                 | C25A1.6     | 89               | 18        |
| <b>other</b>                                |             |                  |           |
| GMP reductase                               | F32D1.5     | 7                | 27        |
| <i>sex-1</i>                                | F44A6.2     | 44               | 78        |

A

P<0.00001

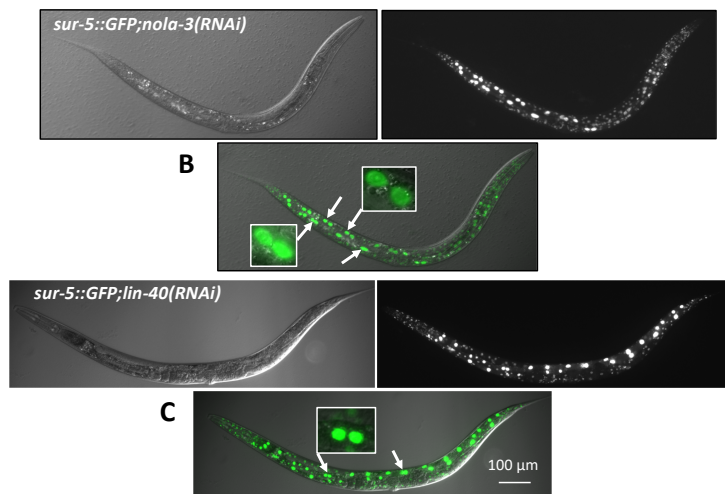

**Fig. S3 Inhibition of DDR genes representing several pathways by RNAi results in abnormal karyokinesis in gut.**

(A) Table showing tested RNAi target genes from the list of genes required for the normal DNA damage response (from van Haafden et al, 2006) and percent of *C. elegans* with affected karyokinesis in gut. The inhibition of genes in blue rows resulted in statistically significant ( $P<0.00001$ ) increase in a number of *C. elegans* with abnormal karyokinesis. (B and C) Bright light, fluorescence and merged images illustrating failed karyokinesis in the gut of *nola-3(RNAi)* and *lin-40(RNAi)*. Arrows and inserts show elongated and double nuclei indicative of abnormal karyokinesis.

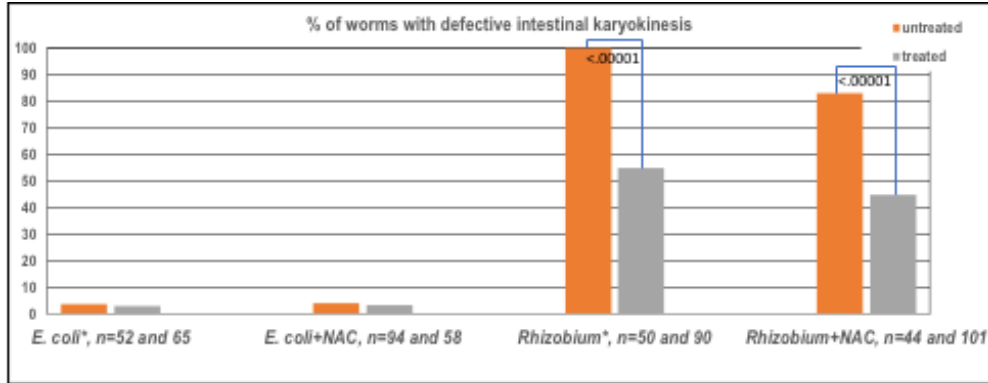

**A**

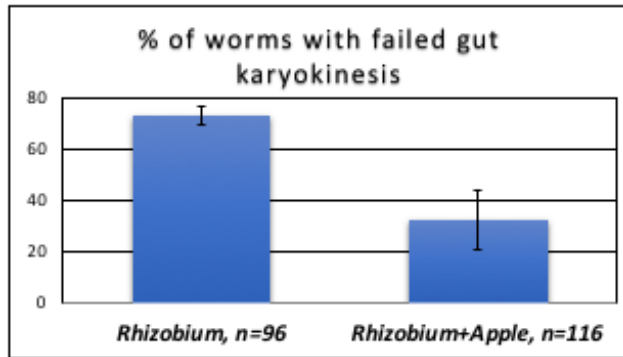

**B**

**Fig. S4. Suppression of *Rhizobium* gut karyokinesis defect by free radical scavengers**

(A) Graph shows % of *C. elegans* with defective intestinal karyokinesis. Eggs (untreated control) or L1 hatched in 5 mM NAC (treated sample) were placed on *E. coli* or *Rhizobium* with and without NAC supplement. P values for untreated vs. treated *C. elegans* on *Rhizobium* without and with NAC supplement were  $4.1E-05$  and  $1E-05$ . \*- 1 ml of water, a solvent for 1 ml NAC, was added to *E. coli* and *Rhizobium* lawns as a control. (B) Graph shows % of *C. elegans* with altered gut nuclei phenotype, which developed either on *Rhizobium* lawn or *Rhizobium* lawn supplemented with a fresh apple slice.

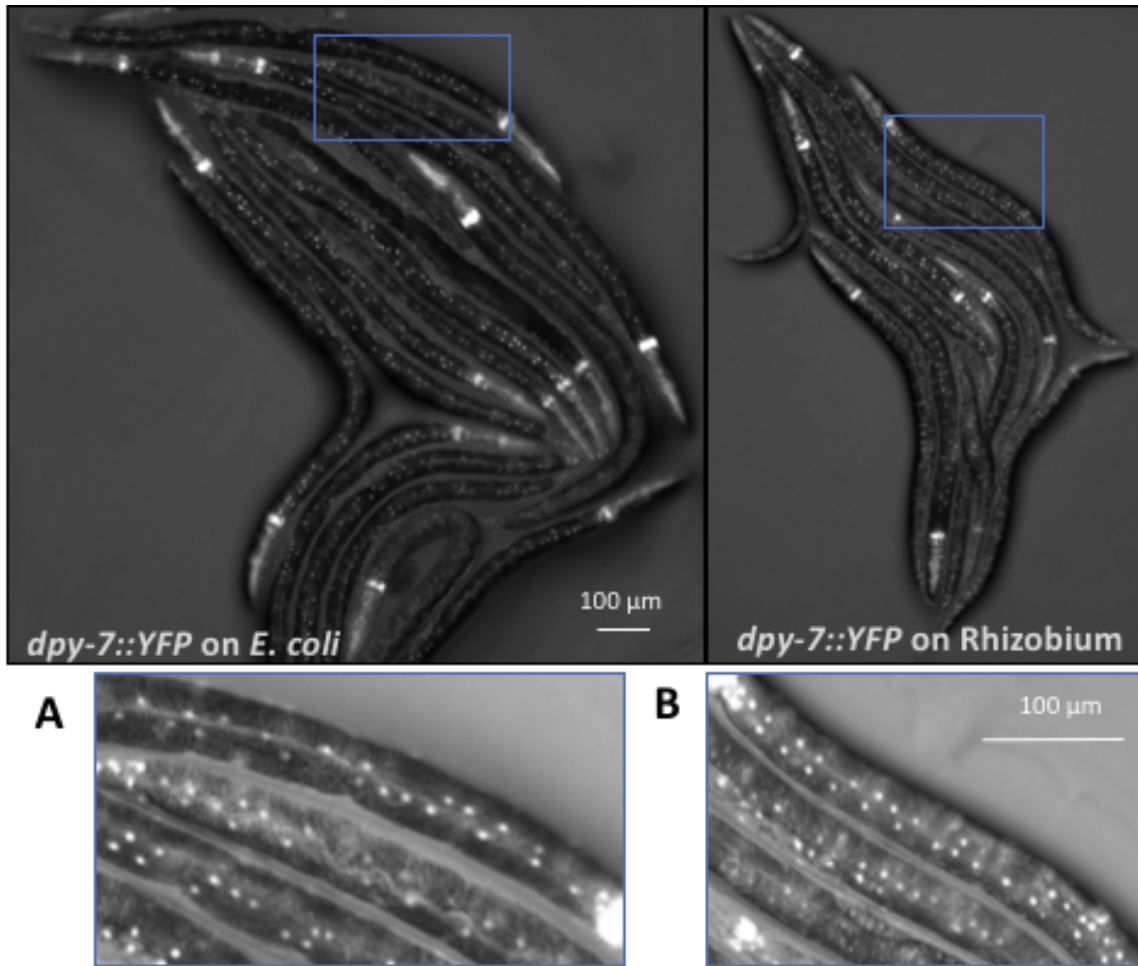

Fig. S5. **Karyokinesis of *C. elegans* hypodermal nuclei is not affected by feeding on *Rhizobium*.**

(A and B) Fluorescence images of *C. elegans* expressing *dpy-7p::2Xnls::YFP* reporter in hypodermal cells grown on *E. coli* and *Rhizobium*. Inserts illustrate similar shapes and distribution patterns of hypodermal nuclei in *C. elegans* fed with either bacteria.

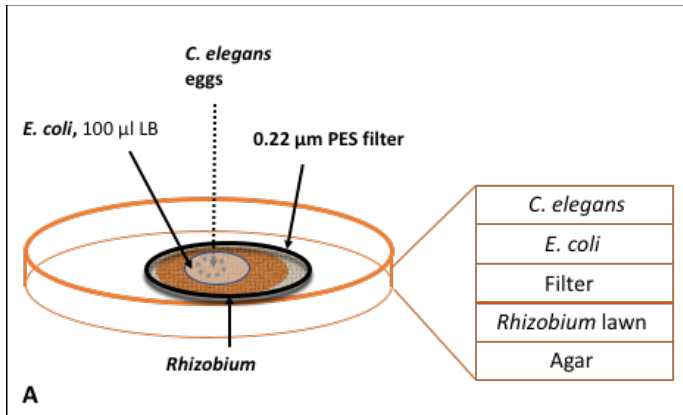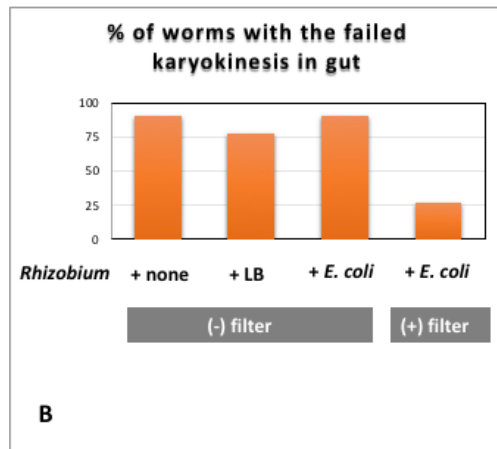

**Fig S6. A close contact between *Rhizobium* cells and *C. elegans* is required for intestinal karyokinesis defects.**

(A) An experimental setup to separate *Rhizobium* cells and *C. elegans* on NGM agar plates covered the *Rhizobium* lawn with a 0.22  $\mu\text{m}$  pore-size filter. An aliquot of *E. coli* suspension is added on the top of the filter to initiate postembryonic growth of *C. elegans*. (B) Graph shows percentage of *C. elegans* with defective karyokinesis under the indicated conditions. The *C. elegans* were maintained from the time of hatching on an untreated *Rhizobium* lawn, or the lawn treated with 100  $\mu\text{l}$  liquid LB media or 100  $\mu\text{l}$  suspension of *E. coli*, or 100  $\mu\text{l}$  of suspension of *E. coli* on top of a filter over the *Rhizobium* lawn,  $n > 50$ . The insert shows a vertical arrangement of layers on a plate.

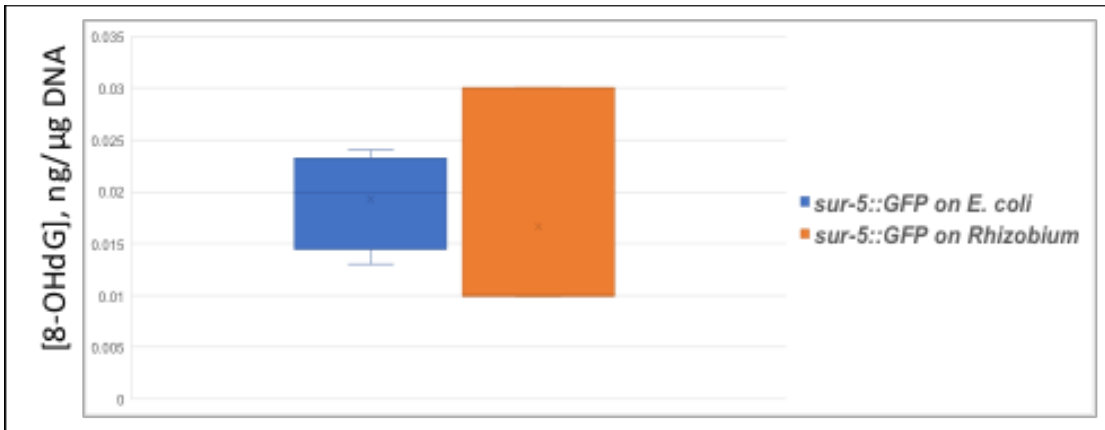

**Concentration of [8-OHdG], ng/μg DNA**

| Replicates | <i>sur-5::GFP</i> on <i>E. coli</i> | <i>sur-5::GFP</i> on <i>Rhizobium</i> |
|------------|-------------------------------------|---------------------------------------|
| #1         | <b>0.013</b>                        | <b>0.03</b>                           |
| #2         | <b>0.019</b>                        | <b>0.01</b>                           |
| #3         | <b>0.021</b>                        | <b>0.01</b>                           |
| #4         | <b>0.024</b>                        | n/a                                   |

Fig. S7. **No significant changes in 8-OHdG levels were detected in the chromosomal DNA isolated from *C. elegans* grown on *E. coli* and *Rhizobium*.**

Graph shows concentration of 8-OHdG per 1 μg of DNA. The data was obtained with OxiSelect Oxidative DNA damage ELISA Kit. The data shown on the graph are detailed on a list below.



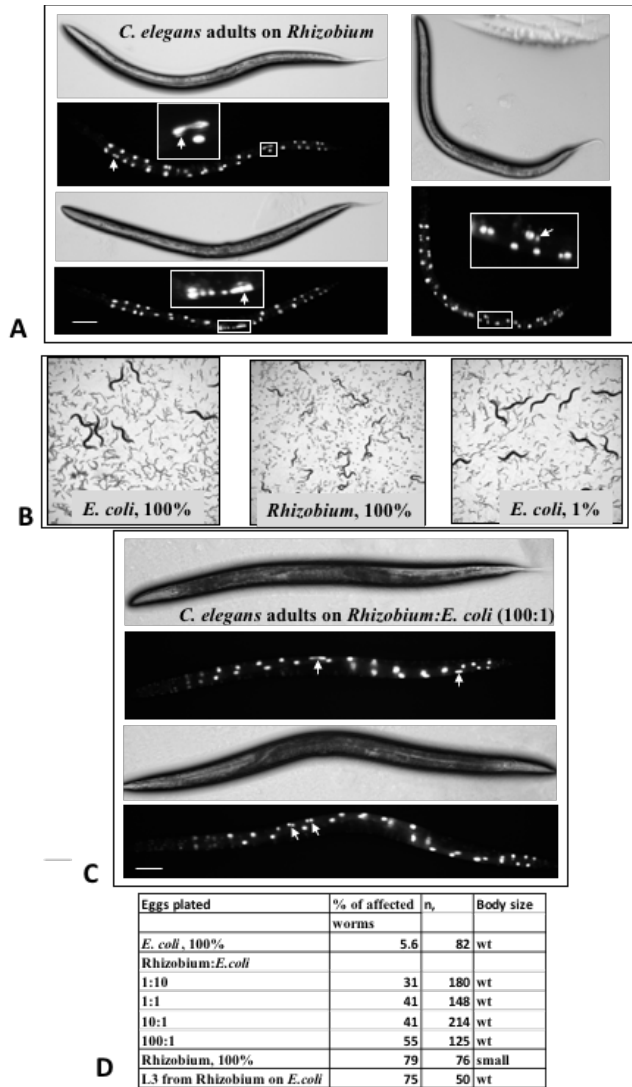

Fig. S8. Small body size of *C. elegans* fed on *Rhizobium* is not correlated with the karyokinesis defect.

(A-C) Fluorescence, DIC, and dissecting scope images of adult *C. elegans* grown on *E. coli* and *Rhizobium*. (A) Upper DIC images show scrawny phenotype of *C. elegans* fed on *Rhizobium*. The inserts on fluorescence images show elongated, double and fragmented nuclei of the gut in *C. elegans* grown on *Rhizobium* (arrows). The scrawny phenotype, but not abnormal gut nuclei morphology can be rescued with *E. coli* mixed with the *Rhizobium* (B-D).

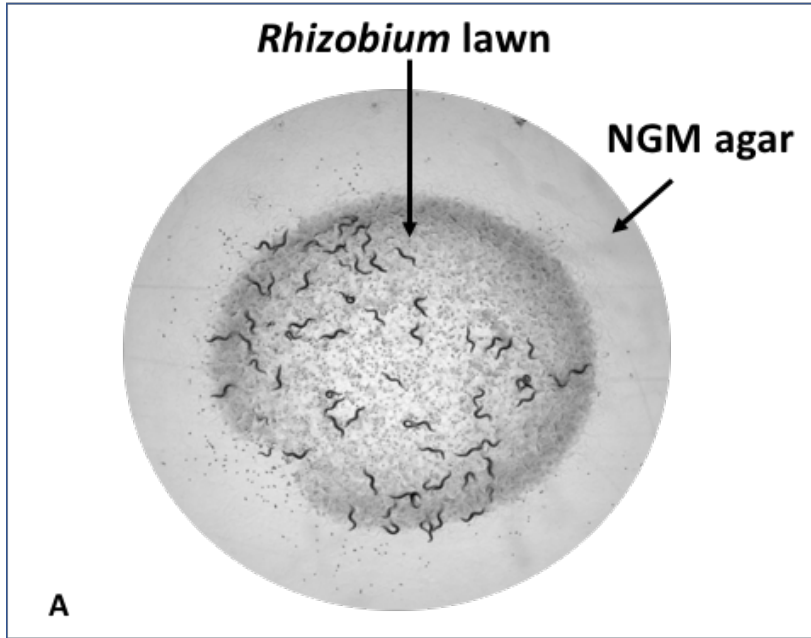

|                  | # with abnormal gut nuclei | number on lawn | n,  |
|------------------|----------------------------|----------------|-----|
| <i>E. coli</i>   | 2                          | 35             | 52  |
| <i>Rhizobium</i> | 69                         | 95             | 100 |

**B**

Fig. S9. *C. elegans* do not avoid *Rhizobium* lawn.

(A) Image of an NGM plate with *C. elegans* grown on 10x concentrated *Rhizobium* lawn from eggs. (B) Quantification of the phenotype on the *E. coli* and *Rhizobium* lawn.

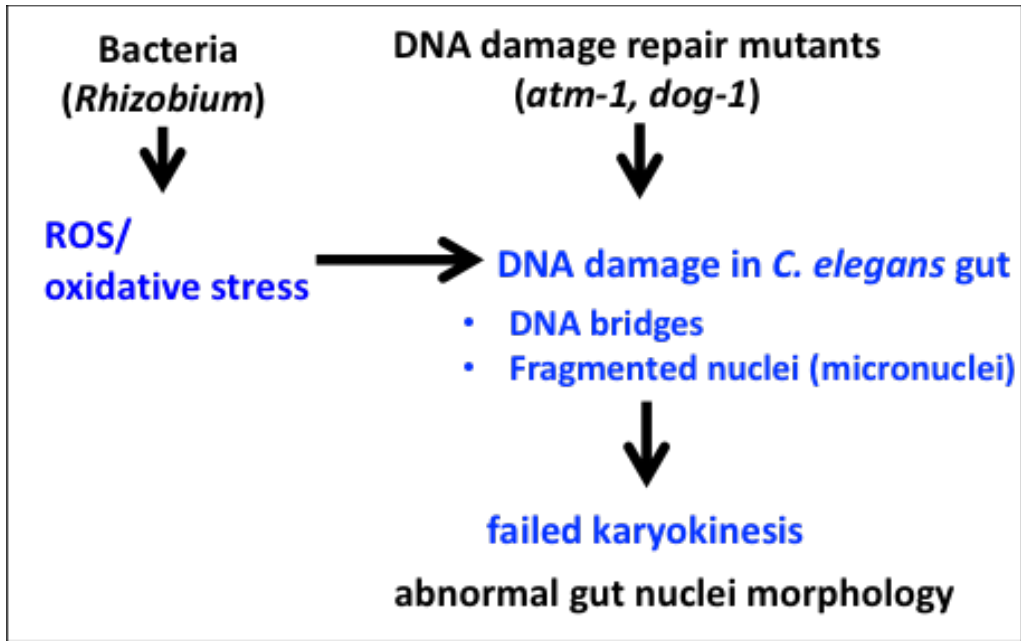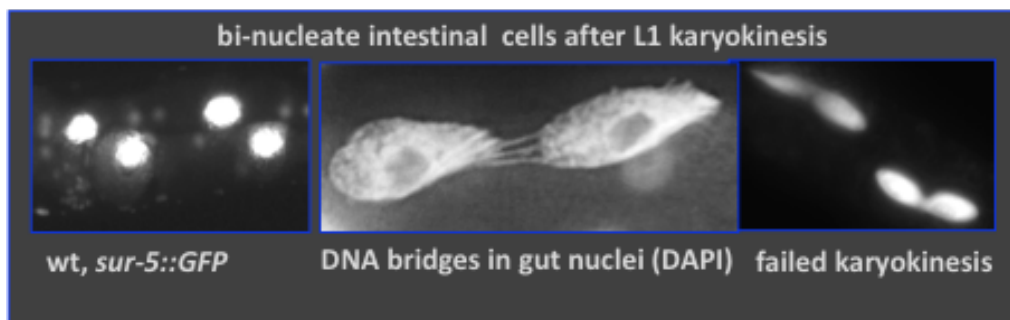

**Fig. S10. Proposed mechanism of *Rhizobium*-induced DNA damage, failed karyokinesis resulting in abnormal gut nuclei patterning.**

The scheme (A) explains how the abnormal *sur-5::GFP*-highlighted gut nuclei phenotype (B) can serve as a readout in screens for genes involved in oxidative stress and DNA damage response and repair.

**Table S1. Evaluation of aberrant karyokinesis phenotype in *C. elegans* wild type and mutants fed on various bacteria under indicated conditions.**

| Feeding Bacterial Strains         | Worm strains                     | Treatment*                       | Average % affected worms | Number of scored worms | Number of affected gut nuclei per worm |     |
|-----------------------------------|----------------------------------|----------------------------------|--------------------------|------------------------|----------------------------------------|-----|
| <i>E. coli</i>                    | <i>sur-5::GFP</i>                | none                             | 4                        | >1,000**               | 1-2                                    |     |
|                                   |                                  | Hydrogen peroxide                | 63                       | 50                     | >10***                                 |     |
|                                   |                                  | 1% oxygen                        | 4                        | 150                    | 1-2                                    |     |
|                                   |                                  | 21%, air                         | 4                        | 150                    | 1-2                                    |     |
|                                   |                                  | 100% oxygen                      | 76                       | 150                    | >2                                     |     |
|                                   |                                  | L1 in water o/n****              | 4                        | 52                     | 1-2                                    |     |
|                                   |                                  | L1 in NAC o/n                    | 3                        | 65                     | 1-2                                    |     |
|                                   |                                  |                                  |                          |                        |                                        |     |
|                                   |                                  | <i>atm-1(mg665);sur-5::GFP^A</i> | none                     | 100                    | >1,000                                 | >10 |
|                                   |                                  | <i>dog-1(mg667);sur-5::GFP^A</i> | none                     | 100                    | >1,000                                 | >10 |
|                                   | <i>atm-1(gk186);sur-5::GFP^^</i> | none                             | 38                       | 50                     | >2                                     |     |
|                                   |                                  | <i>dog-1(gk10);sur-5::GFP^^</i>  | none                     | 25                     | 56                                     | >2  |
| <i>R. huaulense, JUb 45</i>       | <i>sur-5::GFP</i>                | none                             | 78                       | >1,000                 | >2                                     |     |
|                                   |                                  | 1% oxygen                        | 30                       | 150                    | >2                                     |     |
|                                   |                                  | 21%, air                         | 67                       | 150                    | >2                                     |     |
|                                   |                                  | 50% oxygen                       | 70                       | 150                    | >2                                     |     |
|                                   |                                  | 100% oxygen                      | 100                      | 150                    | >10                                    |     |
|                                   |                                  | L1 in water o/n                  | 100                      | 50                     | >2                                     |     |
|                                   |                                  | L1 in NAC o/n                    | 55                       | 90                     | >2                                     |     |
|                                   |                                  | Apple                            | 30                       | 116                    | >2                                     |     |
| <i>R. huaulense, ATCC BAA-115</i> | <i>sur-5::GFP</i>                | none                             | 46                       | 50                     | >2                                     |     |
| <i>R. galegae, ATCC 43677</i>     | <i>sur-5::GFP</i>                | none                             | 58                       | 50                     | >2                                     |     |
| <i>Sphingobacteriu sp. JUb56</i>  | <i>sur-5::GFP</i>                | none                             | >25*****                 | 50                     | >2                                     |     |
| <i>Pseudomonas sp. JUb42</i>      | <i>sur-5::GFP</i>                | none                             | >25                      | 50                     | >2                                     |     |
| <i>Providencia sp. JUb39</i>      | <i>sur-5::GFP</i>                | none                             | >25                      | 50                     | >2                                     |     |

\*- treatments are described in Material and Methods

\*\* - number of scored worms throughout the study

\*\*\* - stopped count at the given number of affected nuclei

\*\*\*\* - o/n, overnight

\*\*\*\*\* - stopped count after 10 affected worms out of 50 on a plate observed

^-EMS mutants from this study

^^ - CGC mutants

**Movie S1. L1 larvae in a drop of S-basal buffer on NGM agar plate are treated with 3% hydrogen peroxide.**

**Movie S2. L1 larvae in a drop of S-basal buffer on *E. coli* lawn are treated with 3% hydrogen peroxide.**

**Movie S3. L1 larvae in a drop of S-basal buffer on *Rhizobium* lawn are treated with 3% hydrogen peroxide.**
